# Supplementary material for: Double Negative B lymphocytes are increased in patients with Systemic Lupus Erythematosus and they are correlated with early differentiated T lymphocyte subpopulations
Source: Preprints.org preprint supplement (doi:10.20944/preprints202307.0589.v1), 2023-07-10
Supplement: Supplementary file 1 [file supplementary]

**Supplement Figure Legents**

**Suppl.**
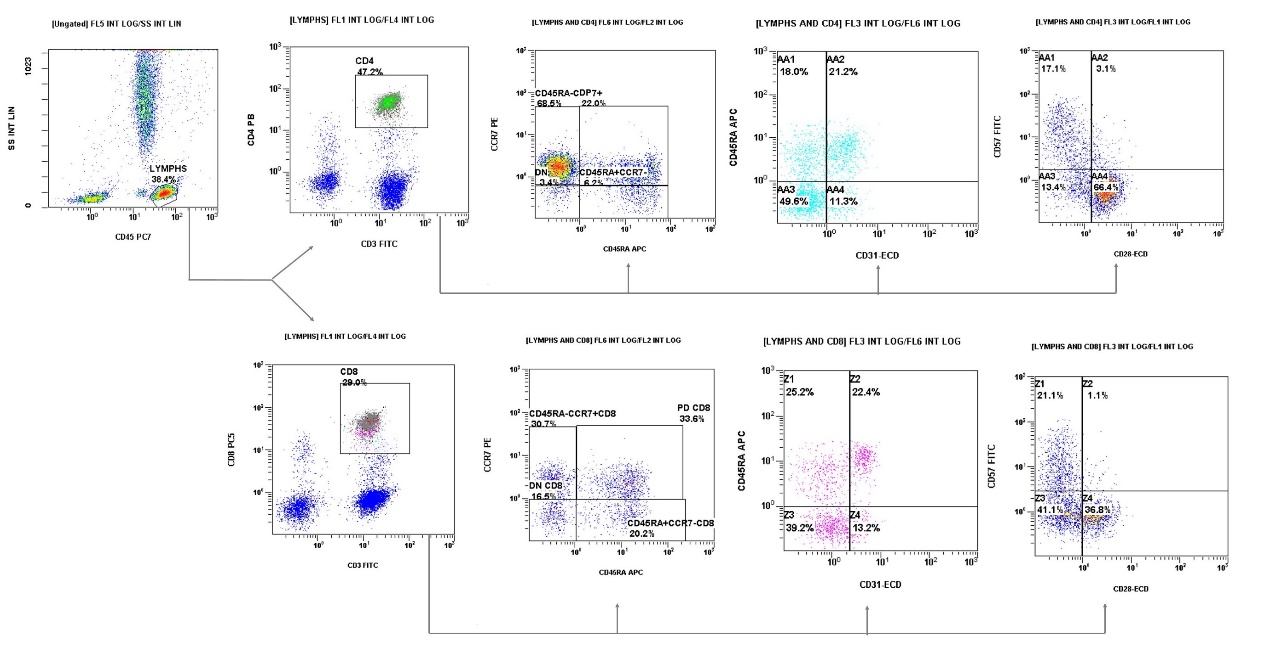
**Figure 1.** Gating strategy for CD4 and CD8 cells, and their subsets, based on the presence of CD45RA, CCR7, CD31, CD57 and CD28


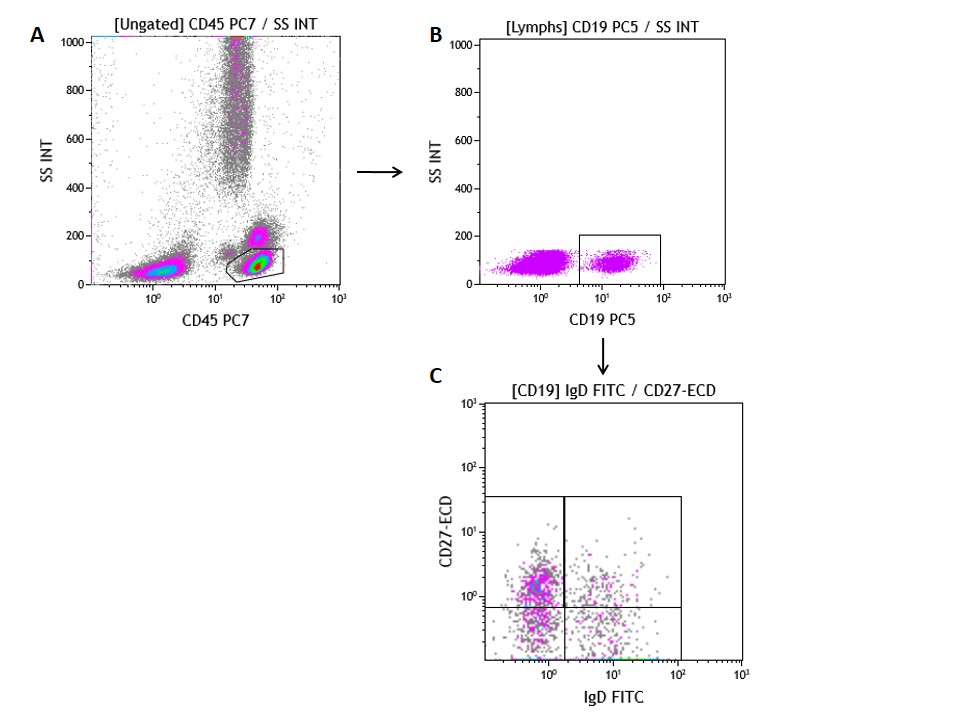


**Suppl. Figure 2.** Gating strategy for CD19+ cells, and their subsets based on the presence of IgD and CD27
